# Supplementary material for: Umbelliferose Isolated from Cuminum cyminum L. Seeds Inhibits Antigen-Induced Degranulation in Rat Basophilic Leukemia RBL-2H3 Cells
Source: MDPI journal article supplement (doi:10.3390/molecules27134101), 2022-06-25
Supplement: s1 [file s1]

Figure S1. NMR spectrum of umbelliferose

|     | <sup>1</sup> H-NMR                               | <sup>13</sup> C-NMR | H <sub>2</sub> BC | HMBC                               | TOCSY                              | <sup>1</sup> H- <sup>1</sup> H<br>COSY |
|-----|--------------------------------------------------|---------------------|-------------------|------------------------------------|------------------------------------|----------------------------------------|
| 1   | δ 3.66 ( <i>m</i> )                              | δ 61.8              | -                 | -                                  | -                                  | -                                      |
| 2   | -                                                | δ 104.3             | -                 | -                                  | -                                  | -                                      |
| 3   | δ 4.13 ( <i>d</i> , <i>J</i> = 8.6 Hz)           | δ 76.2              | δ 73.7            | δ 61.8, 73.7                       | δ 3.76, 4.02                       | δ 4.02                                 |
| 4   | δ 4.02<br>( <i>dd</i> , <i>J</i> = 8.6, 8.6 Hz)  | δ 73.7              | δ 76.2,<br>81.1   | δ 62.0, 76.2, 81.0                 | δ 3.76                             | δ 3.76                                 |
| 5   | δ 3.76 ( <i>m</i> )                              | δ 81.1              | δ 73.7            | δ 73.7                             | -                                  | δ 3.71, 4.02                           |
| 6   | δ 3.71, 3.75 ( <i>m</i> )                        | δ 62.0              | -                 | δ 73.7 (δ 3.71)<br>δ 81.1 (δ 3.71) | -                                  | -                                      |
| 1'  | δ 5.60 ( <i>d</i> , <i>J</i> = 3.6 Hz)           | δ 89.5              | δ 75.5            | δ 71.2, 72.1, 75.5, 104.3          | δ 3.43, 3.59,<br>3.80              | δ 3.59                                 |
| 2'  | δ 3.59<br>( <i>dd</i> , <i>J</i> = 3.6, 9.9 Hz)  | δ 75.5              | δ 71.2            | δ 71.2, 96.4                       | δ 3.43-                            | -                                      |
| 3'  | δ 3.80 ( <i>m</i> )                              | δ 71.2              | δ 75.5            | δ 69.2, 75.5                       | δ 3.43, 3.59                       | δ 3.59                                 |
| 4'  | δ 3.43<br>( <i>dd</i> , <i>J</i> = 9.6, 9.6 Hz)  | δ 69.2              | δ 72.1            | δ 60.2, 71.2, 72.1                 | δ 3.59                             | δ 3.85                                 |
| 5'  | δ 3.85( <i>m</i> )                               | δ 72.1              | δ 69.2            | -                                  | δ 3.43, 3.59,<br>3.72              | δ 3.43                                 |
| 6'  | δ 3.72, 3.74 ( <i>m</i> )                        | δ 60.2              | -                 | δ 69.2 (δ 3.72)                    | δ 3.43 (δ 3.74)<br>δ 3.59 (δ 3.74) | -                                      |
| 1'' | δ 5.08 ( <i>d</i> , <i>J</i> = 3.9 Hz)           | δ 96.4              | δ 68.1            | δ 69.3, 71.0, 75.5                 | δ 3.82, 3.93                       | δ 3.77                                 |
| 2'' | δ 3.77 ( <i>m</i> )                              | δ 68.1              | δ 69.3            | -                                  | -                                  | -                                      |
| 3'' | δ 3.82<br>( <i>dd</i> , <i>J</i> = 3.2, 10.5 Hz) | δ 69.3              | δ 68.1            | δ 68.1                             | -                                  | δ 3.77                                 |
| 4'' | δ 3.93 ( <i>d</i> , <i>J</i> = 3.2 Hz)           | δ 69.0              | -                 | δ 68.1, 69.3                       | δ 3.82                             | -                                      |
| 5'' | δ 4.08 ( <i>t</i> , <i>J</i> = 6.3 Hz)           | δ 71.0              | δ 61.0            | δ 61.0, 69.0, 96.4                 | δ 3.65                             | δ 3.65                                 |
| 6'' | δ 3.65 ( <i>m</i> )                              | δ 61.0              | δ 71.0            | δ 69.0, 71.0                       | -                                  | δ 4.08                                 |

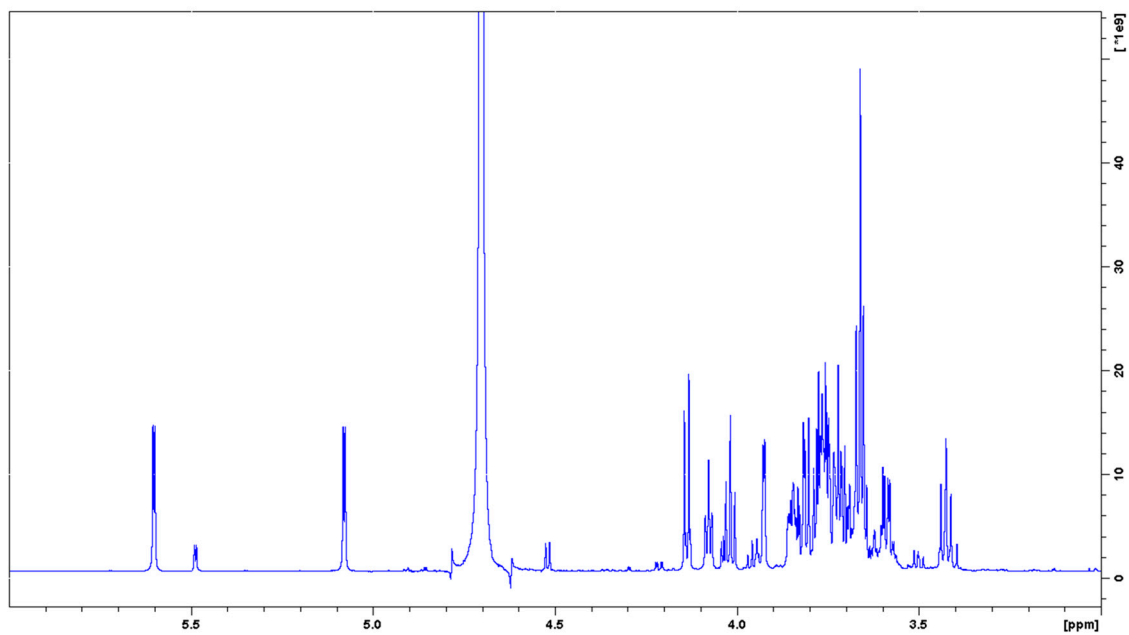

$^1\text{H}$ -NMR spectrum (700 MHz, D<sub>2</sub>O) of umbelliferose

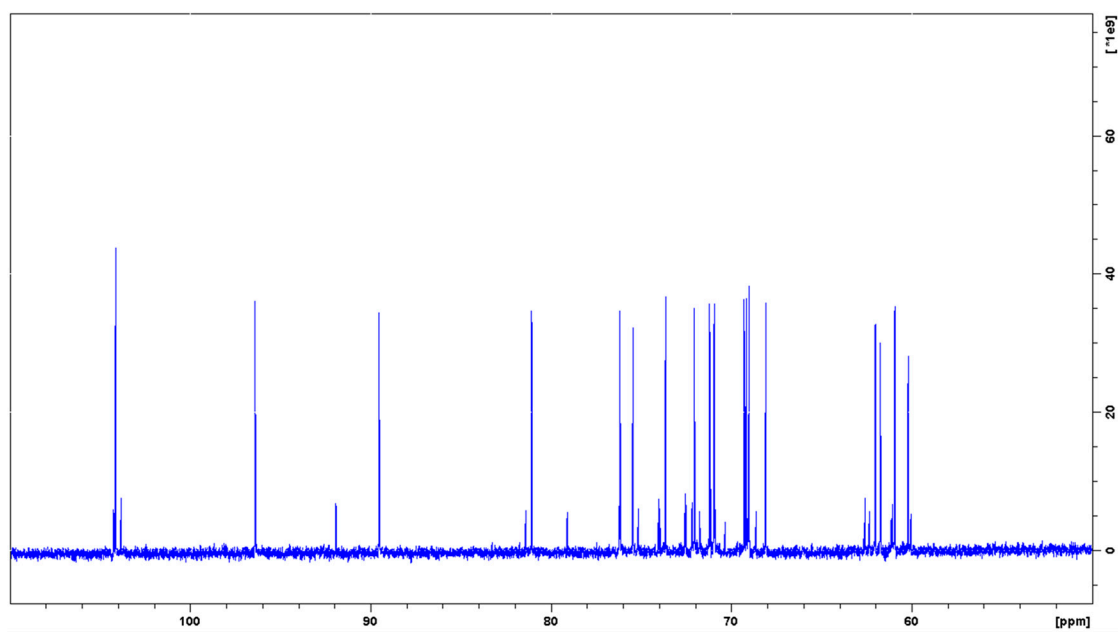

$^{13}\text{C}$ -NMR spectrum (175 MHz, D<sub>2</sub>O) of umbelliferose

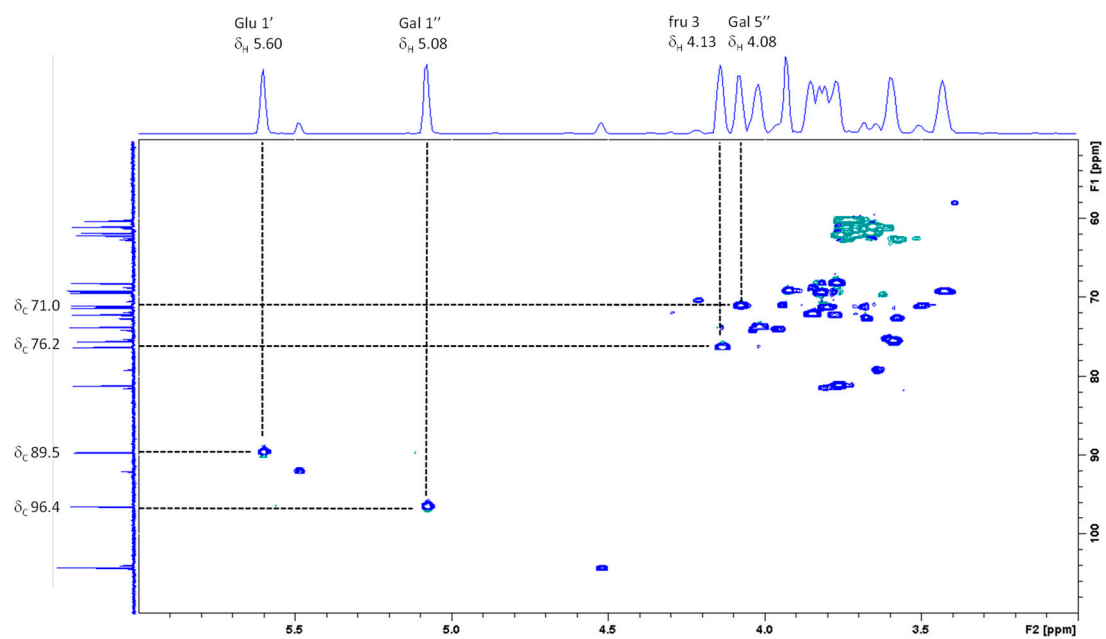

HSQC spectrum (700 MHz, D<sub>2</sub>O) of umbelliferose

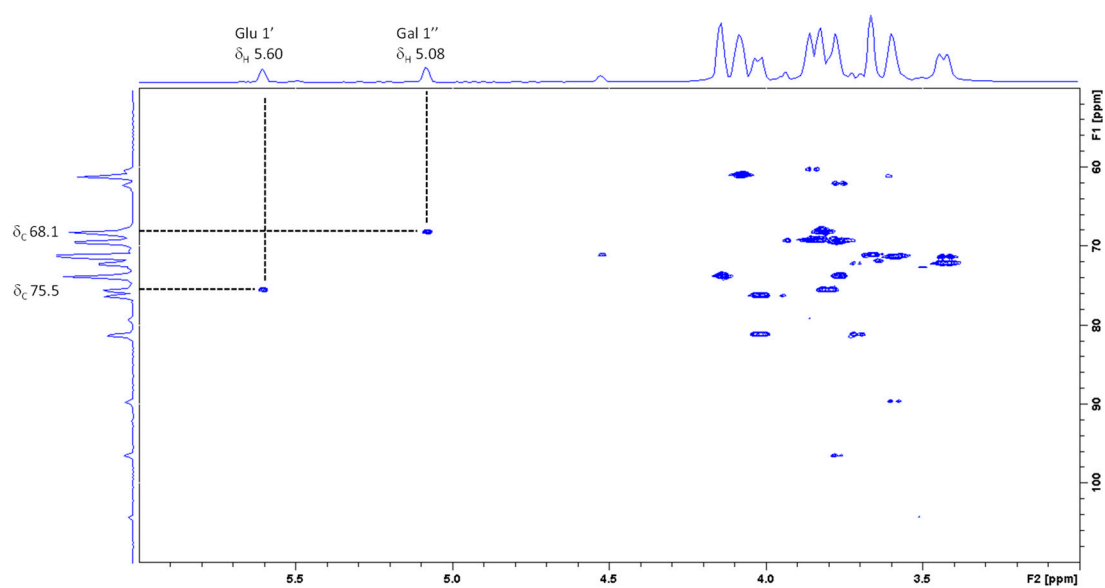

H<sub>2</sub>BC spectrum (700 MHz, D<sub>2</sub>O) of umbelliferose

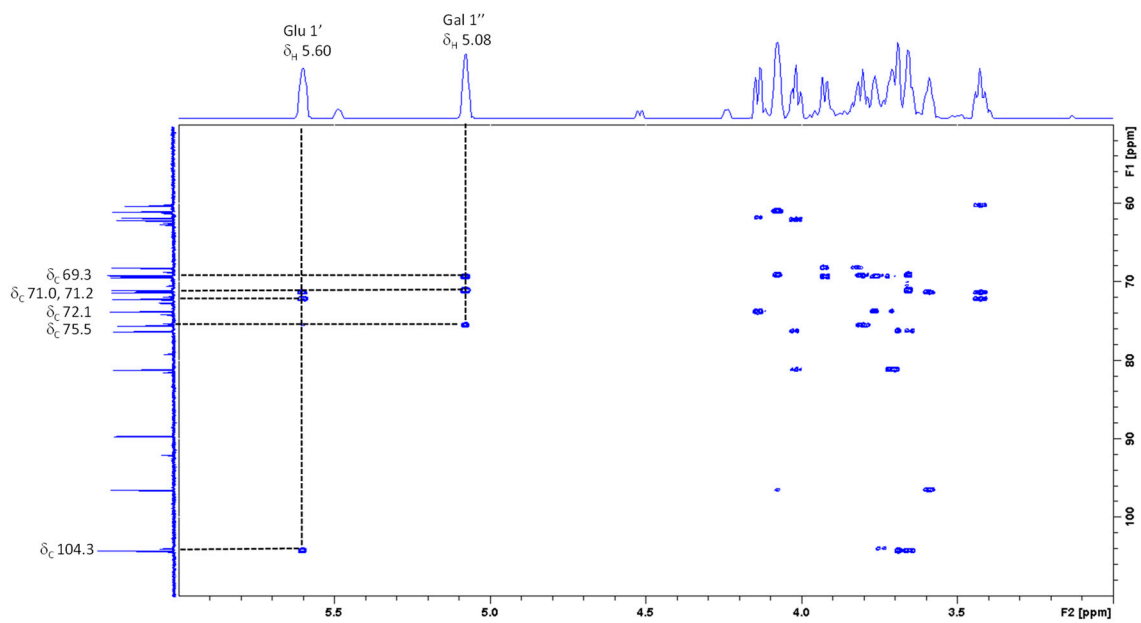

HMBC spectrum (700 MHz, D<sub>2</sub>O) of umbelliferose

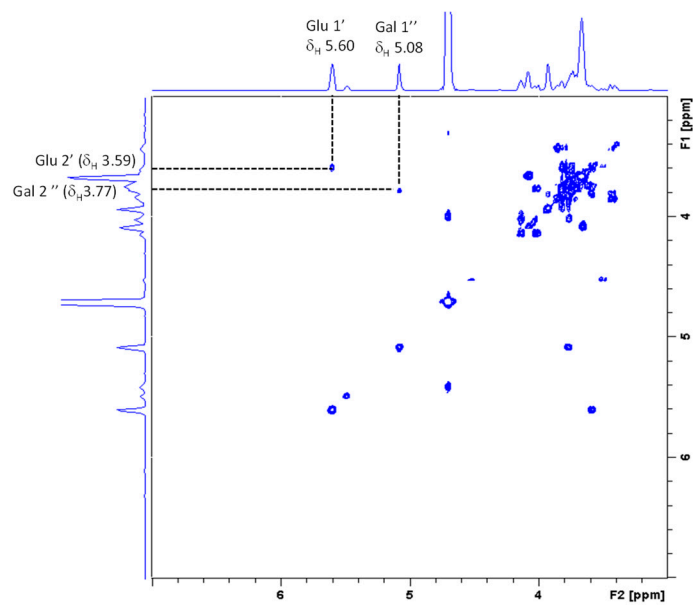

<sup>1</sup>H-<sup>1</sup>H NMR COSY spectrum (700 MHz, D<sub>2</sub>O) of umbelliferose

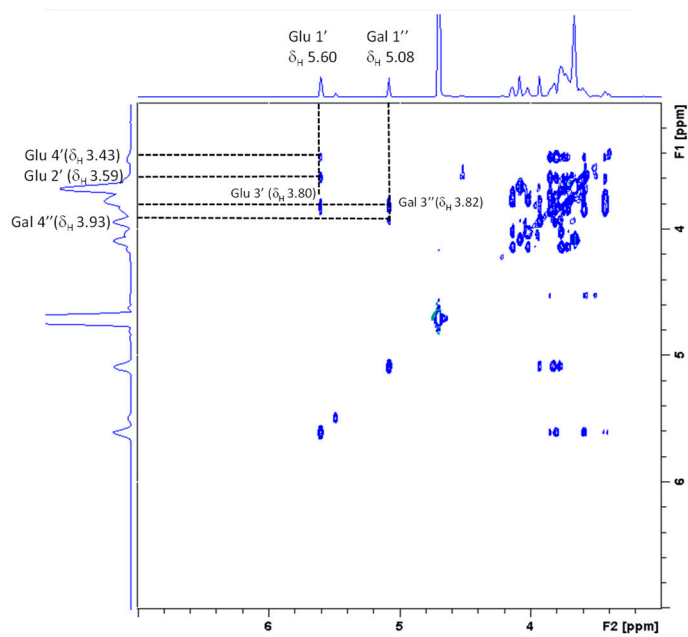

TOCSY spectrum (700 MHz, D<sub>2</sub>O) of umbelliferose
